# Supplementary material
Source: ML conference proceedings conference paper supplement (https://openaccess.thecvf.com/content/ICCV2021/html/Shu_Deep_Survival_Analysis_ICCV_2021_paper.html)
Supplement: Supplementary file 1 [file Shu_Deep_Survival_Analysis_ICCV_2021_supplemental.pdf]

Supplementary material for submission #7091:  
Deep survival analysis with longitudinal X-rays for COVID-19

## 1 Parameter sensitivity study

In the main paper, we investigated both the number of images and the size of mini batch, and concluded that 1) the model improves as the number of images increases for the majority of tasks (admission, ICU discharge, and discharge) and 2) mini-batch size does not affect the model performance for sufficiently large values of  $B$  ( $B \geq 20$ ).

Table 1 summarizes the results.

|                 |         |              |              |         |
|-----------------|---------|--------------|--------------|---------|
| Admission       | $k = 8$ | $k = 4$      | $k = 2$      | $k = 1$ |
| $B = 20$        | 0.195   | 0.191        | 0.180        | 0.272   |
| $B = 40$        | -       | <b>0.171</b> | 0.201        | 0.303   |
| $B = 80$        | -       | -            | 0.198        | 0.232   |
| $B = 142$ (All) | -       | -            | 0.193        | 0.252   |
| ICU Admission   | $k = 8$ | $k = 4$      | $k = 2$      | $k = 1$ |
| $B = 20$        | 0.259   | 0.258        | 0.258        | 0.285   |
| $B = 40$        | -       | <b>0.234</b> | 0.241        | 0.287   |
| $B = 80$        | -       | -            | 0.254        | 0.278   |
| $B = 160$       | -       | -            | 0.237        | 0.277   |
| ICU Discharge   | $k = 8$ | $k = 4$      | $k = 2$      | $k = 1$ |
| $B = 20$        | 0.345   | 0.331        | <b>0.306</b> | 0.427   |
| $B = 40$        | -       | 0.335        | 0.337        | 0.366   |
| $B = 80$        | -       | -            | 0.327        | 0.341   |
| $B = 160$       | -       | -            | 0.330        | 0.358   |
| Discharge       | $k = 8$ | $k = 4$      | $k = 2$      | $k = 1$ |
| $B = 20$        | 0.230   | 0.231        | 0.229        | 0.240   |
| $B = 40$        | -       | 0.229        | 0.232        | 0.233   |
| $B = 80$        | -       | -            | 0.231        | 0.235   |
| $B = 160$       | -       | -            | <b>0.228</b> | 0.238   |
| Death           | $k = 8$ | $k = 4$      | $k = 2$      | $k = 1$ |
| $B = 20$        | 0.268   | 0.271        | 0.279        | 0.262   |
| $B = 40$        | -       | 0.247        | 0.346        | 0.239   |
| $B = 80$        | -       | -            | <b>0.232</b> | 0.249   |
| $B = 160$       | -       | -            | 0.238        | 0.239   |

Table 1: Parameter sensitivity study on mini-batch size  $B$  and maximum number of x-rays per patient  $k$  for Discharge and ICU Discharge Predictions. Performance is measured by concordance error, lower is better. The experiments are conducted on hospitalization (admission) prediction. When  $B = 142$ , all available patients from the training set are included in the mini-batch.

|            | ICU Admit | ICU Discharge | Discharge |
|------------|-----------|---------------|-----------|
| Event #    | 420       | 252           | 1197      |
| Censored # | 1099      | 173           | 333       |

Table 2: Details on the data distribution for each type of events for unfiltered data ablation test.

| Method                 | ICU Admit | ICU Discharge | Discharge |
|------------------------|-----------|---------------|-----------|
| CoxPH (Full)           | 0.414     | 0.373         | 0.273     |
| Weibull (Full)         | 0.331     | 0.324         | 0.264     |
| Gempertz (Full)        | 0.345     | 0.326         | 0.185     |
| DeepSurv               | 0.358     | 0.337         | 0.186     |
| Survival+SVM           | 0.355     | 0.397         | 0.215     |
| Survival+Random Forest | 0.286     | 0.307         | 0.206     |
| Ours                   | 0.302     | 0.238         | 0.173     |

Table 3: Concordance error for time-to-event predictions. Lower is better, colors encode the best performing 3 methods for each event. Full models take input concatenated across all available days, while cross-sectional (CS) models only take time-dependent data from the baseline date, which satisfies the PH assumption.

## 2 Non-Image Data Only Comparisons

We conduct an ablation test on data filtering. As mentioned in our data pipeline, to compare with models that only take images as input, we removed patients that do not have any x-rays taken during the target interval. As a sanity check, the study below uses unfiltered data and compares non-image only models.

Table 3 compares results of ICU Admit, ICU Discharge and (Hospital) Discharge predictions, where there are substantial population changes when we applied the filter. We keep the same event-censor ratio, and split the data randomly into train, eval, and test by 60 : 20 : 20.

The results provide evidence that our technique works well even in the absence of images, independent of the data filtering.

| Type                       | Abbreviation | Unit             |
|----------------------------|--------------|------------------|
| Alanine Transferase        | ALT          | <i>U/L</i>       |
| Glucose Level              | -            | <i>mg/dL</i>     |
| Albumin Level              | Alb          | <i>g/dL</i>      |
| Aspartase Transaminase     | AST          | <i>U/L</i>       |
| Ala Aminotransferase       | ALA          | <i>U/L</i>       |
| Aspartate Aminotransferase | ASA          | <i>U/L</i>       |
| Creatinine                 | Cr           | <i>mg/dL</i>     |
| Lymphocyte                 | -            | <i>cells/uL</i>  |
| Creatine Kinase            | CK           | <i>U/L</i>       |
| Lactate Dehydrogenase      | LDH          | <i>U/L</i>       |
| Ferritin Level             | -            | <i>ng/mL</i>     |
| B-Type Natriuretic Peptide | BNP          | <i>pg/mL</i>     |
| Troponin I                 | Trop         | <i>ng/mL</i>     |
| Sedimentation Rate         | ESR          | <i>mm/hr</i>     |
| C-Reactive Protein         | CRP          | <i>mg/dL</i>     |
| D-Dimer,                   | -            | <i>ng/mL</i>     |
| Interleukin-6              | IL-6         | <i>pg/mL</i>     |
| Platelets                  | -            | $\times 10^3/uL$ |
| Thromboplastin Time        | PTT          | <i>s</i>         |
| vs_hr_hr                   | -            | -                |
| xp_resp_spo2               | -            | -                |
| xp_resp_rate_pt            | -            | -                |
| vs_bp_noninvasive (s)      | -            | -                |
| vs_bp_noninvasive (d)      | -            | -                |
| vs_bp_noninvasive (m)      | -            | -                |
| HCO3 (Arterial)            | -            | <i>mmol/L</i>    |
| pO2 (Arterial)             | -            | <i>mmHg</i>      |
| pCO2 (Arterial)            | -            | <i>mmHg</i>      |
| pH (Arterial)              | -            | -                |

Table 4: List of time-dependent features used in our technique.

|      | Admit | ICU Admit | ICU Discharge | Discharge | Death |
|------|-------|-----------|---------------|-----------|-------|
| Mean | 2.72  | 1.78      | 6.65          | 2.88      | 4.61  |
| Std  | 3.39  | 1.11      | 4.61          | 3.39      | 4.00  |

Table 5: Details on the number of images per patient within data range
